# Supplementary material
Source: Research Square preprint supplement (doi:10.21203/rs.3.rs-9717404/v1)

SUPPL Figure 1: Mean expression levels of CB1Rs in either Cortex or Hippocampus stratified by sex alone

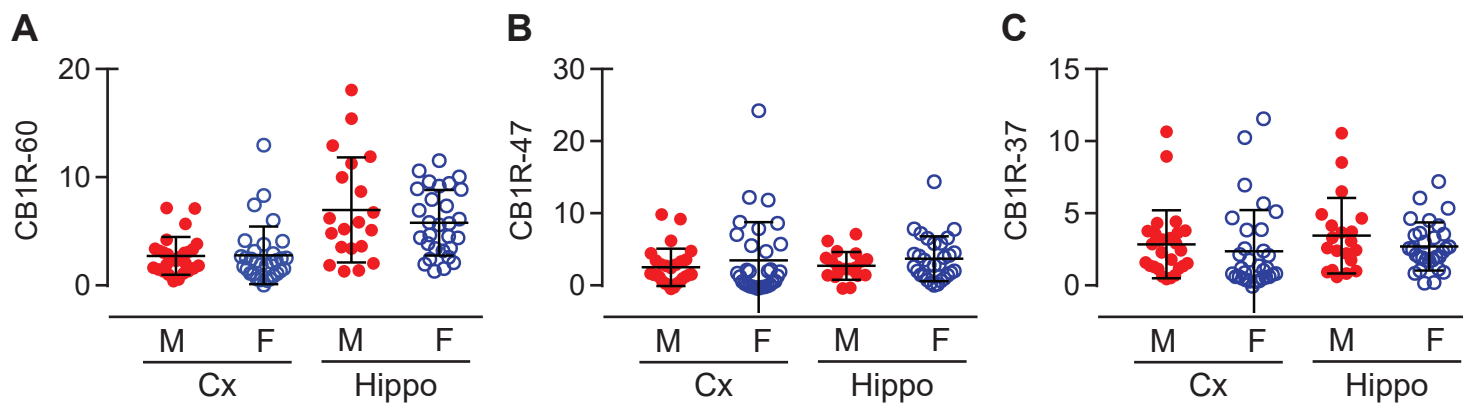

SUPPL Figure 2: Mean expression levels of CB1Rs in either Cortex or Hippocampus stratified by *APOE*  $\epsilon 4$  status alone

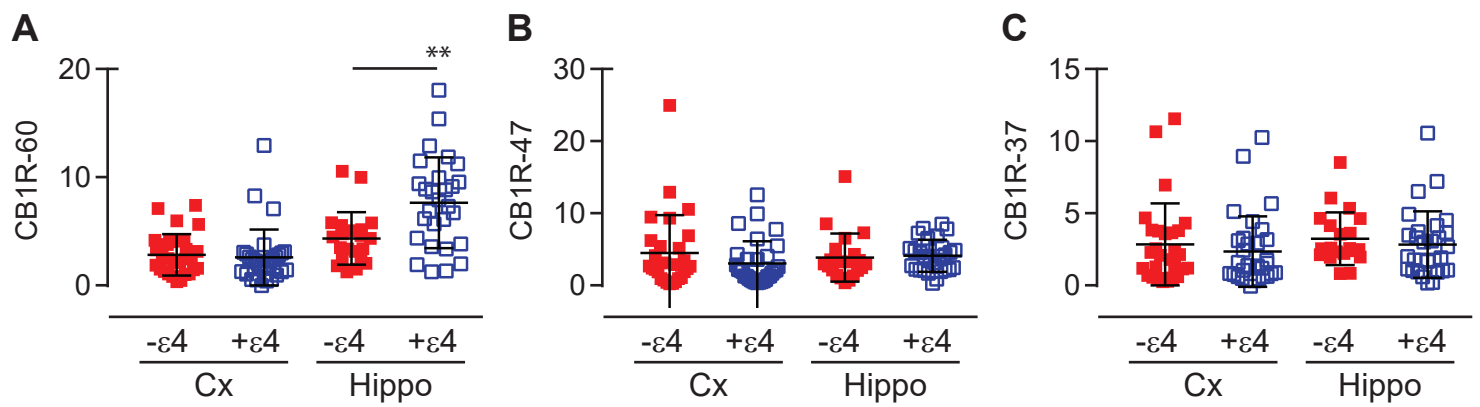

SUPPL Figure 3: Mean expression levels of CB1Rs in Cortex and Hippocampus stratified by *APOE*  $\epsilon$ 4-by-sex (independent of diagnosis)

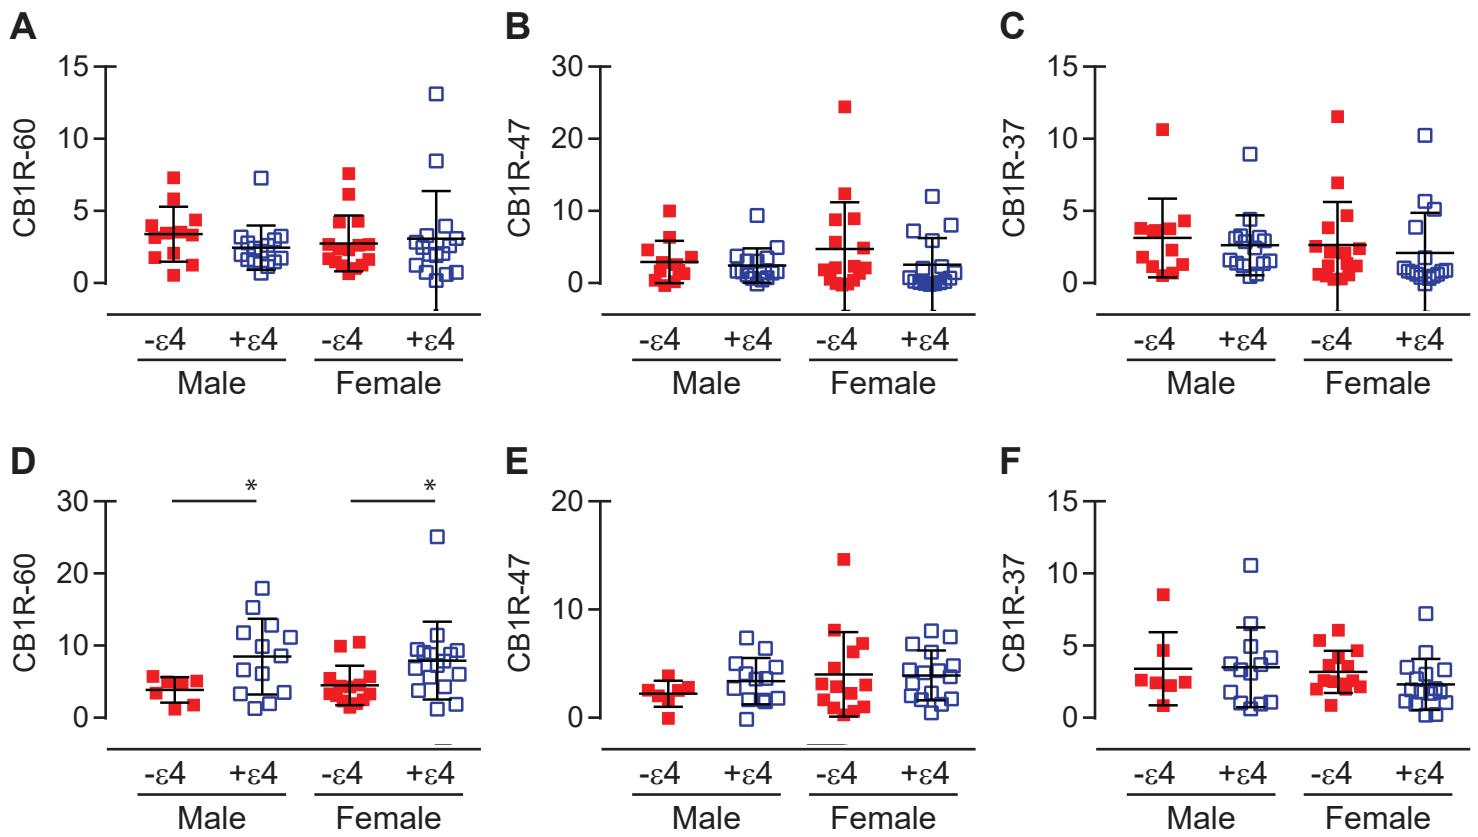

SUPPL Figure 4: Mean expression levels of FAAH and MAGL in either Cortex or Hippocampus stratified by *APOE*  $\epsilon 4$  by sex

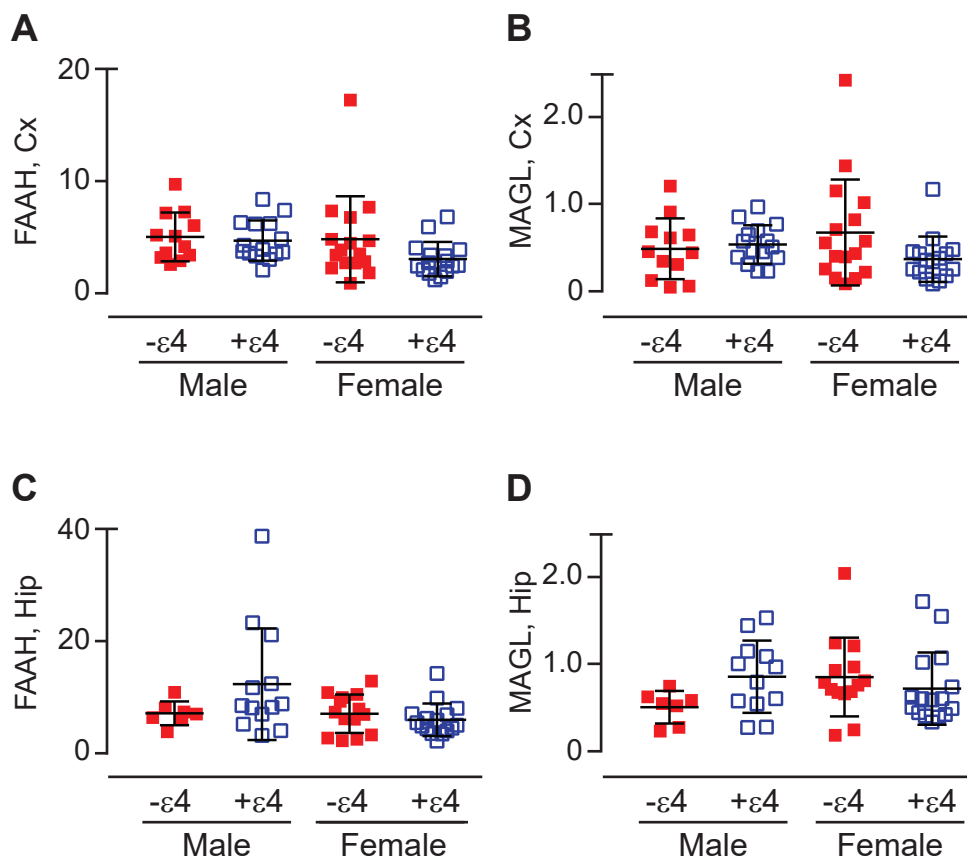

Supplement: Supplementary file 1 [file 9df0bcce9aad01bcd709ba1f.pdf]
