# Supplementary material
Source: Research Square preprint supplement (doi:10.21203/rs.3.rs-9717404/v1)
Supplement: Supplementary file 2 [file bde2a35e8832fea1a346cfc6.pdf]

| Cortex      | Age vs 60 | Male                   | Female                 |
|-------------|-----------|------------------------|------------------------|
|             |           | P = 0.2611             | P = 0.0929             |
|             |           | R <sup>2</sup> = 0.050 | R <sup>2</sup> = 0.091 |
| Cortex      | Age vs 47 | Male                   | Female                 |
|             |           | P = 0.1856             | P = 0.8998             |
|             |           | R <sup>2</sup> = 0.069 | R <sup>2</sup> = 0.001 |
| Cortex      | Age vs 37 | Male                   | Female                 |
|             |           | P = 0.6683             | P = 0.5200             |
|             |           | R <sup>2</sup> = 0.008 | R <sup>2</sup> = 0.014 |
| Hippocampus | Age vs 60 | Male                   | Female                 |
|             |           | P = 0.6778             | P = 0.5761             |
|             |           | R <sup>2</sup> = 0.010 | R <sup>2</sup> = 0.011 |
| Hippocampus | Age vs 47 | Male                   | Female                 |
|             |           | P = 0.4113             | P = 0.4450             |
|             |           | R <sup>2</sup> = 0.038 | R <sup>2</sup> = 0.021 |
| Hippocampus | Age vs 37 | Male                   | Female                 |
|             |           | P = 0.1910             | P = 0.2300             |
|             |           | R <sup>2</sup> = 0.093 | R <sup>2</sup> = 0.051 |

**SUPPL Table 1: Linear regression – Age (at autopsy, in years) vs CB1R species within either cortex or hippocampus. Significant ( $P \leq 0.05$ ) observations, if any, are identified in bold text. A positive association is identified by ‘↑’, while a negative association is identified by ‘↓’.**

| Cortex      | Age vs<br>FAAH | Male                   | Female                 |
|-------------|----------------|------------------------|------------------------|
|             |                | P = 0.4402             | P = 0.4148             |
|             |                | R <sup>2</sup> = 0.024 | R <sup>2</sup> = 0.022 |
| Cortex      | Age vs<br>MAGL | Male                   | Female                 |
|             |                | P = 0.4447             | P = 0.5026             |
|             |                | R <sup>2</sup> = 0.024 | R <sup>2</sup> = 0.015 |
| Hippocampus | Age vs<br>FAAH | Male                   | Female                 |
|             |                | P = 0.1755             | P = 0.2292             |
|             |                | R <sup>2</sup> = 0.100 | R <sup>2</sup> = 0.051 |
| Hippocampus | Age vs<br>MAGL | Male                   | Female                 |
|             |                | P = 0.4158             | P = 0.7248             |
|             |                | R <sup>2</sup> = 0.039 | R <sup>2</sup> = 0.005 |

**SUPPL Table 2: Linear regression – Age (at autopsy, in years) vs either FAAH or MAGL in either cortex or hippocampus. Significant ( $P \leq 0.05$ ) observations, if any, are identified in bold text. A positive association is identified by ‘↑’, while a negative association is identified by ‘↓’.**

| Cortex | AAO vs 60 | CTL  |        | EOAD                   |                        | LOAD                   |                        |
|--------|-----------|------|--------|------------------------|------------------------|------------------------|------------------------|
|        |           | N/A  |        | P = 0.4903             |                        | P = 0.5339             |                        |
|        |           |      |        | R <sup>2</sup> = 0.035 |                        | R <sup>2</sup> = 0.028 |                        |
|        | AAO vs 60 | Male | Female | Male                   | Female                 | Male                   | Female                 |
|        |           |      |        | P = 0.0948             | P = 0.8960             | P = 0.2576             | P = 0.9708             |
|        |           |      |        | R <sup>2</sup> = 0.458 | R <sup>2</sup> = 0.003 | R <sup>2</sup> = 0.246 | R <sup>2</sup> = 0.000 |
| Cortex | AAO vs 47 | CTL  |        | EOAD                   |                        | LOAD                   |                        |
|        |           | N/A  |        | P = 0.8917             |                        | P = 0.6117             |                        |
|        |           |      |        | R <sup>2</sup> = 0.001 |                        | R <sup>2</sup> = 0.019 |                        |
|        | AAO vs 47 | Male | Female | Male                   | Female                 | Male                   | Female                 |
|        |           |      |        | <b>P = 0.0421</b> ↓    | P = 0.2631             | P = 0.4398             | P = 0.9622             |
|        |           |      |        | R <sup>2</sup> = 0.596 | R <sup>2</sup> = 0.175 | R <sup>2</sup> = 0.123 | R <sup>2</sup> = 0.000 |
| Cortex | AAO vs 37 | CTL  |        | EOAD                   |                        | LOAD                   |                        |
|        |           | N/A  |        | P = 0.5089             |                        | P = 0.2077             |                        |
|        |           |      |        | R <sup>2</sup> = 0.032 |                        | R <sup>2</sup> = 0.111 |                        |
|        | AAO vs 37 | Male | Female | Male                   | Female                 | Male                   | Female                 |
|        |           |      |        | P = 0.0797             | P = 0.2410             | P = 0.2040             | P = 0.4311             |
|        |           |      |        | R <sup>2</sup> = 0.490 | R <sup>2</sup> = 0.190 | R <sup>2</sup> = 0.299 | R <sup>2</sup> = 0.091 |

**SUPPL Table 3: Linear regression – Age At Onset (AAO, in years) vs CB1R species within cortex. Significant ( $P \leq 0.05$ ) observations, if any, are identified in bold text. A positive association is identified by ‘↑’, while a negative association is identified by ‘↓’. N/A: not applicable.**

| Hippocampus | AAO vs 60 | CTL  | EOAD                   |                        | LOAD                   |                        |                        |
|-------------|-----------|------|------------------------|------------------------|------------------------|------------------------|------------------------|
|             |           | N/A  | P = 0.6132             |                        | P = 0.6927             |                        |                        |
|             |           |      | R <sup>2</sup> = 0.020 |                        | R <sup>2</sup> = 0.012 |                        |                        |
|             | AAO vs 60 | Male | Female                 | Male                   | Female                 | Male                   | Female                 |
|             |           |      |                        | P = 0.2847             | P = 0.9009             | P = 0.1203             | P = 0.2771             |
|             |           |      |                        | R <sup>2</sup> = 0.223 | R <sup>2</sup> = 0.003 | R <sup>2</sup> = 0.492 | R <sup>2</sup> = 0.166 |
| Hippocampus | AAO vs 47 | CTL  | EOAD                   |                        | LOAD                   |                        |                        |
|             |           | N/A  | <b>P = 0.0090</b> ↓    |                        | P = 0.5014             |                        |                        |
|             |           |      | R <sup>2</sup> = 0.420 |                        | R <sup>2</sup> = 0.036 |                        |                        |
|             | AAO vs 47 | Male | Female                 | Male                   | Female                 | Male                   | Female                 |
|             |           |      |                        | P = 0.6115             | P = 0.0741             | P = 0.4900             | P = 0.6784             |
|             |           |      |                        | R <sup>2</sup> = 0.055 | R <sup>2</sup> = 0.437 | R <sup>2</sup> = 0.126 | R <sup>2</sup> = 0.026 |
| Hippocampus | AAO vs 37 | CTL  | EOAD                   |                        | LOAD                   |                        |                        |
|             |           | N/A  | P = 0.8590             |                        | P = 0.3398             |                        |                        |
|             |           |      | R <sup>2</sup> = 0.003 |                        | R <sup>2</sup> = 0.070 |                        |                        |
|             | AAO vs 37 | Male | Female                 | Male                   | Female                 | Male                   | Female                 |
|             |           |      |                        | P = 0.3430             | P = 0.4438             | P = 0.2413             | P = 0.4907             |
|             |           |      |                        | R <sup>2</sup> = 0.180 | R <sup>2</sup> = 0.101 | R <sup>2</sup> = 0.321 | R <sup>2</sup> = 0.070 |

**SUPPL Table 4: Linear regression – Age At Onset (AAO, in years) vs CB1R species within hippocampus. Significant ( $P \leq 0.05$ ) observations, if any, are identified in bold text. A positive association is identified by ‘↑’, while a negative association is identified by ‘↓’. N/A: not applicable.**

| Cortex      | AAO vs<br>FAAH | CTL  |        | EOAD                   |                        | LOAD                   |                        |
|-------------|----------------|------|--------|------------------------|------------------------|------------------------|------------------------|
|             |                | N/A  |        | P = 0.1048             |                        | P = 0.7560             |                        |
|             |                |      |        | R <sup>2</sup> = 0.177 |                        | R <sup>2</sup> = 0.007 |                        |
|             | AAO vs<br>FAAH | Male | Female | Male                   | Female                 | Male                   | Female                 |
|             |                |      |        | P = 0.1969             | P = 0.0707             | P = 0.8164             | P = 0.5986             |
|             |                |      |        | R <sup>2</sup> = 0.307 | R <sup>2</sup> = 0.393 | R <sup>2</sup> = 0.012 | R <sup>2</sup> = 0.042 |
| Cortex      | AAO vs<br>MAGL | CTL  |        | EOAD                   |                        | LOAD                   |                        |
|             |                | N/A  |        | <b>P = 0.0337</b> ↑    |                        | P = 0.3553             |                        |
|             |                |      |        | R <sup>2</sup> = 0.284 |                        | R <sup>2</sup> = 0.062 |                        |
|             | AAO vs<br>MAGL | Male | Female | Male                   | Female                 | Male                   | Female                 |
|             |                |      |        | P = 0.8786             | P = 0.2483             | P = 0.3838             | P = 0.4963             |
|             |                |      |        | R <sup>2</sup> = 0.005 | R <sup>2</sup> = 0.185 | R <sup>2</sup> = 0.154 | R <sup>2</sup> = 0.069 |
| Hippocampus | AAO vs<br>FAAH | CTL  |        | EOAD                   |                        | LOAD                   |                        |
|             |                | N/A  |        | <b>P = 0.0145</b> ↑    |                        | P = 0.1320             |                        |
|             |                |      |        | R <sup>2</sup> = 0.380 |                        | R <sup>2</sup> = 0.166 |                        |
|             | AAO vs<br>FAAH | Male | Female | Male                   | Female                 | Male                   | Female                 |
|             |                |      |        | P = 0.2305             | P = 0.1198             | P = 0.8134             | P = 0.0891             |
|             |                |      |        | R <sup>2</sup> = 0.271 | R <sup>2</sup> = 0.354 | R <sup>2</sup> = 0.016 | R <sup>2</sup> = 0.357 |
| Hippocampus | AAO vs<br>MAGL | CTL  |        | EOAD                   |                        | LOAD                   |                        |
|             |                | N/A  |        | <b>P = 0.0462</b> ↑    |                        | P = 0.1469             |                        |
|             |                |      |        | R <sup>2</sup> = 0.272 |                        | R <sup>2</sup> = 0.167 |                        |
|             | AAO vs<br>MAGL | Male | Female | Male                   | Female                 | Male                   | Female                 |
|             |                |      |        | P = 0.2915             | P = 0.1293             | P = 0.2064             | P = 0.2830             |
|             |                |      |        | R <sup>2</sup> = 0.218 | R <sup>2</sup> = 0.340 | R <sup>2</sup> = 0.463 | R <sup>2</sup> = 0.162 |

**SUPPL Table 5: Linear regression – Age At Onset (AAO, in years) vs either FAAH or MAGL within cortex and hippocampus. Significant ( $P \leq 0.05$ ) observations, if any, are identified in bold text. A positive association is identified by ‘↑’, while a negative association is identified by ‘↓’. N/A: not applicable.**

| Cortex | Duration<br>vs 60 | CTL  | EOAD                   |                        | LOAD                   |                        |                        |
|--------|-------------------|------|------------------------|------------------------|------------------------|------------------------|------------------------|
|        |                   | N/A  | P = 0.0790             |                        | P = 0.9434             |                        |                        |
|        |                   |      | R <sup>2</sup> = 0.218 |                        | R <sup>2</sup> = 0.000 |                        |                        |
|        | Duration<br>vs 60 | Male | Female                 | Male                   | Female                 | Male                   | Female                 |
|        |                   |      |                        | <b>P = 0.0434</b> ↑    | P = 0.4667             | P = 0.3810             | P = 0.5439             |
|        |                   |      |                        | R <sup>2</sup> = 0.680 | R <sup>2</sup> = 0.078 | R <sup>2</sup> = 0.156 | R <sup>2</sup> = 0.055 |
| Cortex | Duration<br>vs 47 | CTL  | EOAD                   |                        | LOAD                   |                        |                        |
|        |                   | N/A  | P = 0.1134             |                        | P = 0.1669             |                        |                        |
|        |                   |      | R <sup>2</sup> = 0.181 |                        | R <sup>2</sup> = 0.132 |                        |                        |
|        | Duration<br>vs 47 | Male | Female                 | Male                   | Female                 | Male                   | Female                 |
|        |                   |      |                        | <b>P = 0.0379</b> ↑    | P = 0.5380             | P = 0.9137             | P = 0.1293             |
|        |                   |      |                        | R <sup>2</sup> = 0.700 | R <sup>2</sup> = 0.057 | R <sup>2</sup> = 0.003 | R <sup>2</sup> = 0.270 |
| Cortex | Duration<br>vs 37 | CTL  | EOAD                   |                        | LOAD                   |                        |                        |
|        |                   | N/A  | P = 0.8362             |                        | P = 0.2727             |                        |                        |
|        |                   |      | R <sup>2</sup> = 0.003 |                        | R <sup>2</sup> = 0.085 |                        |                        |
|        | Duration<br>vs 37 | Male | Female                 | Male                   | Female                 | Male                   | Female                 |
|        |                   |      |                        | P = 0.4230             | P = 0.4350             | P = 0.8839             | P = 0.3622             |
|        |                   |      |                        | R <sup>2</sup> = 0.166 | R <sup>2</sup> = 0.089 | R <sup>2</sup> = 0.005 | R <sup>2</sup> = 0.120 |

**SUPPL Table 6: Linear regression – Duration (in years) vs CB1R species within cortex. Significant ( $P \leq 0.05$ ) observations, if any, are identified in bold text. A positive association is identified by ‘↑’, while a negative association is identified by ‘↓’. N/A: not applicable.**

| Hippocampus | Duration<br>vs 60 | CTL  | EOAD                   |                        | LOAD                   |                        |                        |
|-------------|-------------------|------|------------------------|------------------------|------------------------|------------------------|------------------------|
|             |                   | N/A  | <b>P = 0.0205</b> ↑    |                        | P = 0.6984             |                        |                        |
|             |                   |      | R <sup>2</sup> = 0.372 |                        | R <sup>2</sup> = 0.012 |                        |                        |
|             | Duration<br>vs 60 | Male | Female                 | Male                   | Female                 | Male                   | Female                 |
|             |                   |      |                        | <b>P = 0.0339</b> ↑    | P = 0.1705             | P = 0.6840             | P = 0.5093             |
|             |                   |      |                        | R <sup>2</sup> = 0.704 | R <sup>2</sup> = 0.288 | R <sup>2</sup> = 0.046 | R <sup>2</sup> = 0.065 |
| Hippocampus | Duration<br>vs 47 | CTL  | EOAD                   |                        | LOAD                   |                        |                        |
|             |                   | N/A  | P = 0.9962             |                        | P = 0.8371             |                        |                        |
|             |                   |      | R <sup>2</sup> = 0.000 |                        | R <sup>2</sup> = 0.003 |                        |                        |
|             | Duration<br>vs 47 | Male | Female                 | Male                   | Female                 | Male                   | Female                 |
|             |                   |      |                        | P = 0.7966             | P = 0.7617             | P = 0.2001             | P = 0.9810             |
|             |                   |      |                        | R <sup>2</sup> = 0.019 | R <sup>2</sup> = 0.017 | R <sup>2</sup> = 0.370 | R <sup>2</sup> = 0.000 |
| Hippocampus | Duration<br>vs 37 | CTL  | EOAD                   |                        | LOAD                   |                        |                        |
|             |                   | N/A  | P = 0.9713             |                        | P = 0.7172             |                        |                        |
|             |                   |      | R <sup>2</sup> = 0.001 |                        | R <sup>2</sup> = 0.010 |                        |                        |
|             | Duration<br>vs 37 | Male | Female                 | Male                   | Female                 | Male                   | Female                 |
|             |                   |      |                        | P = 0.5650             | P = 0.7069             | P = 0.3513             | P = 0.7694             |
|             |                   |      |                        | R <sup>2</sup> = 0.089 | R <sup>2</sup> = 0.025 | R <sup>2</sup> = 0.217 | R <sup>2</sup> = 0.013 |

**SUPPL Table 7: Linear regression – Duration (in years) vs CB1R species within hippocampus. Significant ( $P \leq 0.05$ ) observations, if any, are identified in bold text. A positive association is identified by ‘↑’, while a negative association is identified by ‘↓’. N/A: not applicable.**

|             |                     |                        |            |                        |                        |                        |                        |
|-------------|---------------------|------------------------|------------|------------------------|------------------------|------------------------|------------------------|
| Cortex      | Duration vs<br>FAAH | CTL                    | EOAD       |                        | LOAD                   |                        |                        |
|             |                     | N/A                    | P = 0.3287 |                        | P = 0.5472             |                        |                        |
|             |                     | R <sup>2</sup> = 0.073 |            | R <sup>2</sup> = 0.027 |                        |                        |                        |
|             | Duration vs<br>FAAH | Male                   | Female     | Male                   | Female                 | Male                   | Female                 |
|             |                     |                        |            | P = 0.3293             | P = 0.2999             | P = 0.3602             | P = 0.3426             |
|             |                     |                        |            | R <sup>2</sup> = 0.236 | R <sup>2</sup> = 0.152 | R <sup>2</sup> = 0.169 | R <sup>2</sup> = 0.129 |
| Cortex      | Duration vs<br>MAGL | CTL                    | EOAD       |                        | LOAD                   |                        |                        |
|             |                     | N/A                    | P = 0.6936 |                        | P = 0.4149             |                        |                        |
|             |                     | R <sup>2</sup> = 0.012 |            | R <sup>2</sup> = 0.048 |                        |                        |                        |
|             | Duration vs<br>MAGL | Male                   | Female     | Male                   | Female                 | Male                   | Female                 |
|             |                     |                        |            | P = 0.3657             | P = 0.4258             | P = 0.6969             | P = 0.2879             |
|             |                     |                        |            | R <sup>2</sup> = 0.206 | R <sup>2</sup> = 0.093 | R <sup>2</sup> = 0.033 | R <sup>2</sup> = 0.160 |
| Hippocampus | Duration vs<br>FAAH | CTL                    | EOAD       |                        | LOAD                   |                        |                        |
|             |                     | N/A                    | P = 0.3993 |                        | P = 0.7393             |                        |                        |
|             |                     | R <sup>2</sup> = 0.060 |            | R <sup>2</sup> = 0.009 |                        |                        |                        |
|             | Duration vs<br>FAAH | Male                   | Female     | Male                   | Female                 | Male                   | Female                 |
|             |                     | CTL                    |            | P = 0.6188             | P = 0.3740             | P = 0.9016             | P = 0.7708             |
|             |                     | N/A                    |            | R <sup>2</sup> = 0.068 | R <sup>2</sup> = 0.133 | R <sup>2</sup> = 0.004 | R <sup>2</sup> = 0.013 |
| Hippocampus | Duration vs<br>MAGL | CTL                    | EOAD       |                        | LOAD                   |                        |                        |
|             |                     | N/A                    | P = 0.4184 |                        | P = 0.4212             |                        |                        |
|             |                     | R <sup>2</sup> = 0.055 |            | R <sup>2</sup> = 0.055 |                        |                        |                        |
|             | Duration vs<br>MAGL | Male                   | Female     | Male                   | Female                 | Male                   | Female                 |
|             |                     |                        |            | P = 0.4022             | P = 0.8845             | P = 0.2980             | P = 0.2561             |
|             |                     |                        |            | R <sup>2</sup> = 0.180 | R <sup>2</sup> = 0.004 | R <sup>2</sup> = 0.345 | R <sup>2</sup> = 0.179 |

**SUPPL Table 8: Linear regression – Duration (in years) vs either FAAH or MAGL within cortex and hippocampus. Significant ( $P \leq 0.05$ ) observations, if any, are identified in bold text. A positive association is identified by ‘↑’, while a negative association is identified by ‘↓’. N/A: not applicable.**

|                 | Cortex                 | Cortex                 | Hippocampus            | Hippocampus            |
|-----------------|------------------------|------------------------|------------------------|------------------------|
| <b>60 vs 47</b> | Male                   | Female                 | Male                   | Female                 |
|                 | <b>P = 0.0003</b> ↑    | <b>P = 0.0001</b> ↑    | P = 0.0179             | P = 0.3051             |
|                 | R <sup>2</sup> = 0.408 | R <sup>2</sup> = 0.391 | R <sup>2</sup> = 0.274 | R <sup>2</sup> = 0.038 |
| <b>60 vs 37</b> | Male                   | Female                 | Male                   | Female                 |
|                 | P = 0.2057             | <b>P &lt; 0.0001</b> ↑ | P = 0.6640             | P = 0.3416             |
|                 | R <sup>2</sup> = 0.063 | R <sup>2</sup> = 0.471 | R <sup>2</sup> = 0.011 | R <sup>2</sup> = 0.032 |
| <b>47 vs 37</b> | Male                   | Female                 | Male                   | Female                 |
|                 | P = 0.1169             | <b>P &lt; 0.0001</b> ↑ | P = 0.0553             | P = 0.3363             |
|                 | R <sup>2</sup> = 0.095 | R <sup>2</sup> = 0.742 | R <sup>2</sup> = 0.189 | R <sup>2</sup> = 0.033 |

**SUPPL Table 9: Linear regression – CB1R species vs CB1R species by sex alone in either cortex or hippocampus. Significant ( $P \leq 0.05$ ) observations, if any, are identified in bold text. A positive association is identified by ‘↑’, while a negative association is identified by ‘↓’.**

| Cortex                   | FAAH vs<br>MAGL  | Male                   | Female                 |
|--------------------------|------------------|------------------------|------------------------|
|                          |                  | <b>P = 0.0043</b> ↑    | <b>P &lt; 0.0001</b> ↑ |
|                          |                  | R <sup>2</sup> = 0.283 | R <sup>2</sup> = 0.788 |
| Hippocampus              | FAAH vs<br>MAGL  | Male                   | Female                 |
|                          |                  | P = 0.1957             | <b>P = 0.0002</b> ↑    |
|                          |                  | R <sup>2</sup> = 0.096 | R <sup>2</sup> = 0.394 |
| Cortex vs<br>Hippocampus | FAAH vs<br>FAAH  | Male                   | Female                 |
|                          |                  | P = 0.5074             | P = 0.2373             |
|                          |                  | R <sup>2</sup> = 0.025 | R <sup>2</sup> = 0.051 |
| Cortex vs<br>Hippocampus | MAGL vs<br>MAGLH | Male                   | Female                 |
|                          |                  | P = 0.3241             | P = 0.7407             |
|                          |                  | R <sup>2</sup> = 0.057 | R <sup>2</sup> = 0.004 |

**SUPPL Table 10: Linear regression – FAAH or MAGL by sex alone within (or between) either cortex or hippocampus. Significant ( $P \leq 0.05$ ) observations, if any, are identified in bold text. A positive association is identified by ‘↑’, while a negative association is identified by ‘↓’.**

|             | FAAH vs 60             |                        | FAAH vs 47             |                        | FAAH vs 37             |                        |
|-------------|------------------------|------------------------|------------------------|------------------------|------------------------|------------------------|
| Cortex      | Male                   | Female                 | Male                   | Female                 | Male                   | Female                 |
|             | <b>P = 0.0059</b> ↑    | <b>P = 0.0175</b> ↑    | <b>P = 0.0024</b> ↑    | <b>P &lt; 0.0001</b> ↑ | P = 0.9177             | <b>P = 0.0038</b> ↑    |
|             | R <sup>2</sup> = 0.266 | R <sup>2</sup> = 0.174 | R <sup>2</sup> = 0.314 | R <sup>2</sup> = 0.423 | R <sup>2</sup> = 0.000 | R <sup>2</sup> = 0.255 |
| Hippocampus | Male                   | Female                 | Male                   | Female                 | Male                   | Female                 |
|             | P = 0.5252             | P = 0.8677             | P = 0.7855             | P = 0.7756             | P = 0.4606             | P = 0.0508             |
|             | R <sup>2</sup> = 0.023 | R <sup>2</sup> = 0.001 | R <sup>2</sup> = 0.004 | R <sup>2</sup> = 0.003 | R <sup>2</sup> = 0.030 | R <sup>2</sup> = 0.130 |

|             | MAGL vs 60             |                        | MAGL vs 47             |                        | MAGL vs 37             |                        |
|-------------|------------------------|------------------------|------------------------|------------------------|------------------------|------------------------|
| Cortex      | Male                   | Female                 | Male                   | Female                 | Male                   | Female                 |
|             | P = 0.6511             | <b>P = 0.0124</b> ↑    | <b>P = 0.0005</b> ↑    | <b>P &lt; 0.0001</b> ↑ | P = 0.3443             | <b>P &lt; 0.0001</b> ↑ |
|             | R <sup>2</sup> = 0.008 | R <sup>2</sup> = 0.191 | R <sup>2</sup> = 0.392 | R <sup>2</sup> = 0.482 | R <sup>2</sup> = 0.189 | R <sup>2</sup> = 0.488 |
| Hippocampus | Male                   | Female                 | Male                   | Female                 | Male                   | Female                 |
|             | P = 0.2647             | P = 0.7945             | <b>P = 0.0005</b> ↑    | P = 0.6565             | P = 0.6629             | P = 0.3005             |
|             | R <sup>2</sup> = 0.073 | R <sup>2</sup> = 0.003 | R <sup>2</sup> = 0.524 | R <sup>2</sup> = 0.007 | R <sup>2</sup> = 0.012 | R <sup>2</sup> = 0.038 |

**SUPPL Table 11: Linear regression – FAAH or MAGL vs CB1R species by sex alone in either cortex or hippocampus. Significant ( $P \leq 0.05$ ) observations, if any, are identified in bold text. A positive association is identified by ‘↑’, while a negative association is identified by ‘↓’.**

| Hippocampus | 60 vs 47 | CTL                    |                        | EOAD                   |                        | LOAD                   |                        |
|-------------|----------|------------------------|------------------------|------------------------|------------------------|------------------------|------------------------|
|             |          | P = 0.3280             |                        | P = 0.4668             |                        | P = 0.4125             |                        |
|             |          | R <sup>2</sup> = 0.063 |                        | R <sup>2</sup> = 0.041 |                        | R <sup>2</sup> = 0.045 |                        |
|             | 60 vs 47 | Male                   | Female                 | Male                   | Female                 | Male                   | Female                 |
|             |          | P = 0.4312             | P = 0.5567             | P = 0.9421             | P = 0.5541             | <b>P = 0.0275</b> ↑    | P = 0.5982             |
|             |          | R <sup>2</sup> = 0.161 | R <sup>2</sup> = 0.040 | R <sup>2</sup> = 0.001 | R <sup>2</sup> = 0.061 | R <sup>2</sup> = 0.655 | R <sup>2</sup> = 0.036 |
| Hippocampus | 60 vs 37 | CTL                    |                        | EOAD                   |                        | LOAD                   |                        |
|             |          | P = 0.0722             |                        | P = 0.6380             |                        | P = 0.8056             |                        |
|             |          | R <sup>2</sup> = 0.200 |                        | R <sup>2</sup> = 0.018 |                        | R <sup>2</sup> = 0.004 |                        |
|             | 60 vs 37 | Male                   | Female                 | Male                   | Female                 | Male                   | Female                 |
|             |          | P = 0.8904             | <b>P = 0.0468</b> ↑    | P = 0.7882             | P = 0.5908             | P = 0.9103             | P = 0.2370             |
|             |          | R <sup>2</sup> = 0.005 | R <sup>2</sup> = 0.371 | R <sup>2</sup> = 0.016 | R <sup>2</sup> = 0.051 | R <sup>2</sup> = 0.003 | R <sup>2</sup> = 0.170 |
| Hippocampus | 47 vs 37 | CTL                    |                        | EOAD                   |                        | LOAD                   |                        |
|             |          | P = 0.0576             |                        | P = 0.5497             |                        | P = 0.6729             |                        |
|             |          | R <sup>2</sup> = 0.207 |                        | R <sup>2</sup> = 0.028 |                        | R <sup>2</sup> = 0.012 |                        |
|             | 47 vs 37 | Male                   | Female                 | Male                   | Female                 | Male                   | Female                 |
|             |          | <b>P = 0.0402</b> ↑    | P = 0.4349             | P = 0.1089             | P = 0.5509             | P = 0.7930             | P = 0.3757             |
|             |          | R <sup>2</sup> = 0.691 | R <sup>2</sup> = 0.062 | R <sup>2</sup> = 0.432 | R <sup>2</sup> = 0.062 | R <sup>2</sup> = 0.015 | R <sup>2</sup> = 0.099 |

**SUPPL Table 12: Linear regression by diagnosis – CB1R species vs CB1R species within hippocampus. CTL: control; EOAD: Early-Onset AD; LOAD: Late-Onset AD. Significant ( $P \leq 0.05$ ) observations, if any, are identified in bold text. A positive association is identified by ‘↑’, while a negative association is identified by ‘↓’.**

| Cortex vs<br>Hippocampus | 60 vs 60 | CTL                    |                        | EOAD                   |                        | LOAD                   |                        |
|--------------------------|----------|------------------------|------------------------|------------------------|------------------------|------------------------|------------------------|
|                          |          |                        | P = 0.2258             |                        | <b>P = 0.0001</b> ↑    |                        | P = 0.8484             |
|                          |          | R <sup>2</sup> = 0.096 |                        | R <sup>2</sup> = 0.698 |                        | R <sup>2</sup> = 0.003 |                        |
|                          | 60 vs 60 | Male                   | Female                 | Male                   | Female                 | Male                   | Female                 |
|                          |          | P = 0.8359             | P = 0.2120             | <b>P = 0.0219</b> ↑    | <b>P = 0.0083</b> ↑    | P = 0.6797             | P = 0.2681             |
|                          |          | R <sup>2</sup> = 0.012 | R <sup>2</sup> = 0.167 | R <sup>2</sup> = 0.683 | R <sup>2</sup> = 0.713 | R <sup>2</sup> = 0.037 | R <sup>2</sup> = 0.151 |
| Cortex vs<br>Hippocampus | 47 vs 47 | CTL                    |                        | EOAD                   |                        | LOAD                   |                        |
|                          |          |                        | P = 0.8350             |                        | P = 0.0908             |                        | P = 0.9943             |
|                          |          | R <sup>2</sup> = 0.003 |                        | R <sup>2</sup> = 0.204 |                        | R <sup>2</sup> = 0.000 |                        |
|                          | 47 vs 47 | Male                   | Female                 | Male                   | Female                 | Male                   | Female                 |
|                          |          | P = 0.9464             | P = 0.6524             | P = 0.8259             | P = 0.0774             | P = 0.4147             | P = 0.6819             |
|                          |          | R <sup>2</sup> = 0.001 | R <sup>2</sup> = 0.024 | R <sup>2</sup> = 0.011 | R <sup>2</sup> = 0.430 | R <sup>2</sup> = 0.137 | R <sup>2</sup> = 0.022 |
| Cortex vs<br>Hippocampus | 37 vs 37 | CTL                    |                        | EOAD                   |                        | LOAD                   |                        |
|                          |          |                        | P = 0.5275             |                        | <b>P = 0.0017</b> ↑    |                        | P = 0.6628             |
|                          |          | R <sup>2</sup> = 0.027 |                        | R <sup>2</sup> = 0.543 |                        | R <sup>2</sup> = 0.013 |                        |
|                          | 37 vs 37 | Male                   | Female                 | Male                   | Female                 | Male                   | Female                 |
|                          |          | P = 0.1465             | P = 0.7841             | P = 0.5116             | <b>P = 0.0002</b> ↑    | P = 0.9377             | P = 0.9307             |
|                          |          | R <sup>2</sup> = 0.447 | R <sup>2</sup> = 0.009 | R <sup>2</sup> = 0.091 | R <sup>2</sup> = 0.913 | R <sup>2</sup> = 0.001 | R <sup>2</sup> = 0.001 |

**SUPPL Table 13: Linear regression by diagnosis – CB1R species vs CB1R species between cortex and hippocampus. CTL: control; EOAD: Early-Onset AD; LOAD: Late-Onset AD. Significant (P ≤ 0.05) observations, if any, are identified in bold text. A positive association is identified by ‘↑’, while a negative association is identified by ‘↓’.**

| Cortex | FAAH vs 60 | CTL                    | EOAD                    |                        | LOAD                   |                        |                        |
|--------|------------|------------------------|-------------------------|------------------------|------------------------|------------------------|------------------------|
|        |            | P = 0.0593             | <b>P = 0.0277</b> ↑     |                        | P = 0.1268↑            |                        |                        |
|        |            | R <sup>2</sup> = 0.146 | R <sup>2</sup> = 0.301  |                        | R <sup>2</sup> = 0.140 |                        |                        |
|        | FAAH vs 60 | Male                   | Female                  | Male                   | Female                 | Male                   | Female                 |
|        |            | <b>P = 0.0303</b> ↑    | P = 0.3094              | P = 0.1501             | P = 0.0525             | P = 0.7286             | P = 0.1993             |
|        |            | R <sup>2</sup> = 0.385 | R <sup>2</sup> = 0.094  | R <sup>2</sup> = 0.366 | R <sup>2</sup> = 0.437 | R <sup>2</sup> = 0.022 | R <sup>2</sup> = 0.197 |
| Cortex | FAAH vs 47 | CTL                    | EOAD                    |                        | LOAD                   |                        |                        |
|        |            | <b>P = 0.0051</b> ↑    | <b>P = 0.0129</b> ↑     |                        | P = 0.0547             |                        |                        |
|        |            | R <sup>2</sup> = 0.294 | R <sup>2</sup> = 0.367  |                        | R <sup>2</sup> = 0.212 |                        |                        |
|        | FAAH vs 47 | Male                   | Female                  | Male                   | Female                 | Male                   | Female                 |
|        |            | <b>P = 0.0085</b> ↑    | P = 0.0756              | P = 0.2299             | <b>P = 0.0310</b> ↑    | P = 0.4744             | <b>P = 0.0015</b> ↑    |
|        |            | R <sup>2</sup> = 0.516 | R <sup>2</sup> = 0.2591 | R <sup>2</sup> = 0.272 | R <sup>2</sup> = 0.509 | R <sup>2</sup> = 0.088 | R <sup>2</sup> = 0.738 |
| Cortex | FAAH vs 37 | CTL                    | EOAD                    |                        | LOAD                   |                        |                        |
|        |            | P = 0.1495             | P = 0.2241              |                        | P = 0.1700             |                        |                        |
|        |            | R <sup>2</sup> = 0.088 | R <sup>2</sup> = 0.104  |                        | R <sup>2</sup> = 0.114 |                        |                        |
|        | FAAH vs 37 | Male                   | Female                  | Male                   | Female                 | Male                   | Female                 |
|        |            | P = 0.5279             | P = 0.0707              | P = 0.4082             | P = 0.6313             | P = 0.1773             | P = 0.6893             |
|        |            | R <sup>2</sup> = 0.041 | R <sup>2</sup> = 0.267  | R <sup>2</sup> = 0.140 | R <sup>2</sup> = 0.034 | R <sup>2</sup> = 0.280 | R <sup>2</sup> = 0.021 |

**SUPPL Table 14: Linear regression by diagnosis – FAAH vs CB1R species within cortex. CTL: control; EOAD: Early-Onset AD; LOAD: Late-Onset AD. Significant ( $P \leq 0.05$ ) observations, if any, are identified in bold text. A positive association is identified by ‘↑’, while a negative association is identified by ‘↓’.**

| Hippocampus | FAAH vs 60 | CTL                    |                        | EOAD                   |                        | LOAD                   |                        |
|-------------|------------|------------------------|------------------------|------------------------|------------------------|------------------------|------------------------|
|             |            | P = 0.3610             |                        | P = 0.9836             |                        | P = 0.4333             |                        |
|             |            | R <sup>2</sup> = 0.056 |                        | R <sup>2</sup> = 0.000 |                        | R <sup>2</sup> = 0.041 |                        |
|             | FAAH vs 60 | Male                   | Female                 | Male                   | Female                 | Male                   | Female                 |
|             |            | P = 0.8918             | P = 0.2947             | P = 0.9420             | P = 0.6007             | P = 0.6679             | P = 0.5207             |
|             |            | R <sup>2</sup> = 0.005 | R <sup>2</sup> = 0.121 | R <sup>2</sup> = 0.001 | R <sup>2</sup> = 0.048 | R <sup>2</sup> = 0.040 | R <sup>2</sup> = 0.053 |
| Hippocampus | FAAH vs 47 | CTL                    |                        | EOAD                   |                        | LOAD                   |                        |
|             |            | <b>P = 0.0029</b> ↑    |                        | P = 0.2375             |                        | P = 0.5413             |                        |
|             |            | R <sup>2</sup> = 0.434 |                        | R <sup>2</sup> = 0.106 |                        | R <sup>2</sup> = 0.025 |                        |
|             | FAAH vs 47 | Male                   | Female                 | Male                   | Female                 | Male                   | Female                 |
|             |            | P = 0.0595             | <b>P = 0.0348</b> ↑    | P = 0.4327             | P = 0.2162             | P = 0.7877             | P = 0.4681             |
|             |            | R <sup>2</sup> = 0.630 | R <sup>2</sup> = 0.375 | R <sup>2</sup> = 0.127 | R <sup>2</sup> = 0.242 | R <sup>2</sup> = 0.016 | R <sup>2</sup> = 0.068 |
| Hippocampus | FAAH vs 37 | CTL                    |                        | EOAD                   |                        | LOAD                   |                        |
|             |            | P = 0.0614             |                        | P = 0.9320             |                        | P = 0.7291             |                        |
|             |            | R <sup>2</sup> = 0.202 |                        | R <sup>2</sup> = 0.001 |                        | R <sup>2</sup> = 0.008 |                        |
|             | FAAH vs 37 | Male                   | Female                 | Male                   | Female                 | Male                   | Female                 |
|             |            | P = 0.1469             | P = 0.2674             | P = 0.4953             | P = 0.8054             | P = 0.9756             | P = 0.8048             |
|             |            | R <sup>2</sup> = 0.447 | R <sup>2</sup> = 0.121 | R <sup>2</sup> = 0.098 | R <sup>2</sup> = 0.011 | R <sup>2</sup> = 0.000 | R <sup>2</sup> = 0.008 |

**SUPPL Table 15: Linear regression by diagnosis – FAAH vs CB1R species within hippocampus. CTL: control; EOAD: Early-Onset AD; LOAD: Late-Onset AD. Significant ( $P \leq 0.05$ ) observations, if any, are identified in bold text. A positive association is identified by ‘↑’, while a negative association is identified by ‘↓’.**

| Cortex | MAGL vs 60 | CTL                    |                        | EOAD                    |                        | LOAD                   |                        |
|--------|------------|------------------------|------------------------|-------------------------|------------------------|------------------------|------------------------|
|        |            | P = 0.0613             |                        | P = 0.4831              |                        | P = 0.3966             |                        |
|        |            | R <sup>2</sup> = 0.144 |                        | R <sup>2</sup> = 0.036  |                        | R <sup>2</sup> = 0.045 |                        |
|        | MAGL vs 60 | Male                   | Female                 | Male                    | Female                 | Male                   | Female                 |
|        |            | P = 0.6297             | P = 0.1346             | P = 0.6629              | P = 0.1513             | P = 0.5543             | P = 0.9897             |
|        |            | R <sup>2</sup> = 0.024 | R <sup>2</sup> = 0.192 | R <sup>2</sup> = 0.041  | R <sup>2</sup> = 0.270 | R <sup>2</sup> = 0.061 | R <sup>2</sup> = 0.000 |
| Cortex | MAGL vs 47 | CTL                    |                        | EOAD                    |                        | LOAD                   |                        |
|        |            | <b>P &lt; 0.0001</b> ↑ |                        | P = 0.0726              |                        | <b>P = 0.0331</b> ↑    |                        |
|        |            | R <sup>2</sup> = 0.505 |                        | R <sup>2</sup> = 0.212  |                        | R <sup>2</sup> = 0.254 |                        |
|        | MAGL vs 47 | Male                   | Female                 | Male                    | Female                 | Male                   | Female                 |
|        |            | <b>P &lt; 0.0001</b> ↑ | <b>P = 0.0149</b> ↑    | P = 0.7031              | <b>P = 0.0022</b> ↑    | P = 0.0771             | P = 0.2294             |
|        |            | R <sup>2</sup> = 0.798 | R <sup>2</sup> = 0.430 | R <sup>2</sup> = 0.032  | R <sup>2</sup> = 0.760 | R <sup>2</sup> = 0.431 | R <sup>2</sup> = 0.175 |
| Cortex | MAGL vs 37 | CTL                    |                        | EOAD                    |                        | LOAD                   |                        |
|        |            | <b>P = 0.0290</b> ↑    |                        | <b>P = 0.0339</b> ↑     |                        | <b>P = 0.0031</b> ↑    |                        |
|        |            | R <sup>2</sup> = 0.191 |                        | R <sup>2</sup> = 0.2955 |                        | R <sup>2</sup> = 0.431 |                        |
|        | MAGL vs 37 | Male                   | Female                 | Male                    | Female                 | Male                   | Female                 |
|        |            | P = 0.7559             | <b>P = 0.0241</b> ↑    | P = 0.2948              | P = 0.1413             | <b>P = 0.0374</b> ↑    | <b>P = 0.0325</b> ↑    |
|        |            | R <sup>2</sup> = 0.010 | R <sup>2</sup> = 0.383 | R <sup>2</sup> = 0.215  | R <sup>2</sup> = 0.282 | R <sup>2</sup> = 0.542 | R <sup>2</sup> = 0.455 |

**SUPPL Table 16: Linear regression by diagnosis – MAGL vs CB1R species within cortex. CTL: control; EOAD: Early-Onset AD; LOAD: Late-Onset AD. Significant ( $P \leq 0.05$ ) observations, if any, are identified in bold text. A positive association is identified by ‘↑’, while a negative association is identified by ‘↓’.**

| Hippocampus | MAGL vs 60 | CTL                    |                        | EOAD                   |                        | LOAD                   |                        |
|-------------|------------|------------------------|------------------------|------------------------|------------------------|------------------------|------------------------|
|             |            | P = 0.2596             |                        | P = 0.8579             |                        | P = 0.3424             |                        |
|             |            | R <sup>2</sup> = 0.084 |                        | R <sup>2</sup> = 0.003 |                        | R <sup>2</sup> = 0.065 |                        |
|             | MAGL vs 60 | Male                   | Female                 | Male                   | Female                 | Male                   | Female                 |
|             |            | P = 0.5702             | P = 0.2750             | P = 0.9023             | P = 0.67861            | P = 0.4798             | P = 0.7797             |
|             |            | R <sup>2</sup> = 0.087 | R <sup>2</sup> = 0.131 | R <sup>2</sup> = 0.003 | R <sup>2</sup> = 0.031 | R <sup>2</sup> = 0.132 | R <sup>2</sup> = 0.010 |
| Hippocampus | MAGL vs 47 | CTL                    |                        | EOAD                   |                        | LOAD                   |                        |
|             |            | <b>P &lt; 0.0001</b> ↑ |                        | <b>P = 0.0274</b> ↓    |                        | P = 0.4683             |                        |
|             |            | R <sup>2</sup> = 0.741 |                        | R <sup>2</sup> = 0.322 |                        | R <sup>2</sup> = 0.038 |                        |
|             | MAGL vs 47 | Male                   | Female                 | Male                   | Female                 | Male                   | Female                 |
|             |            | <b>P = 0.0044</b> ↑    | <b>P = 0.0010</b> ↑    | P = 0.6816             | <b>P = 0.0149</b> ↑    | <b>P = 0.0388</b> ↑    | P = 0.9270             |
|             |            | R <sup>2</sup> = 0.894 | R <sup>2</sup> = 0.677 | R <sup>2</sup> = 0.037 | R <sup>2</sup> = 0.656 | R <sup>2</sup> = 0.697 | R <sup>2</sup> = 0.001 |
| Hippocampus | MAGL vs 37 | CTL                    |                        | EOAD                   |                        | LOAD                   |                        |
|             |            | P = 0.1654             |                        | P = 0.6070             |                        | P = 0.7316             |                        |
|             |            | R <sup>2</sup> = 0.117 |                        | R <sup>2</sup> = 0.021 |                        | R <sup>2</sup> = 0.009 |                        |
|             | MAGL vs 37 | Male                   | Female                 | Male                   | Female                 | Male                   | Female                 |
|             |            | P = 0.1027             | P = 0.7072             | P = 0.7502             | P = 0.9241             | P = 0.4921             | P = 0.9252             |
|             |            | R <sup>2</sup> = 0.526 | R <sup>2</sup> = 0.015 | R <sup>2</sup> = 0.022 | R <sup>2</sup> = 0.002 | R <sup>2</sup> = 0.125 | R <sup>2</sup> = 0.001 |

**SUPPL Table 17: Linear regression by diagnosis – MAGL vs CB1R species within hippocampus. CTL: control; EOAD: Early-Onset AD; LOAD: Late-Onset AD. Significant ( $P \leq 0.05$ ) observations, if any, are identified in bold text. A positive association is identified by ‘↑’, while a negative association is identified by ‘↓’.**

| Cortex | 60 vs 47 | (-) $\epsilon$ 4                                 |                                                  | (+) $\epsilon$ 4                                 |                                               |
|--------|----------|--------------------------------------------------|--------------------------------------------------|--------------------------------------------------|-----------------------------------------------|
|        |          | <b>P &lt; 0.0001</b> ↑<br>R <sup>2</sup> = 0.482 |                                                  | <b>P &lt; 0.0001</b> ↑<br>R <sup>2</sup> = 0.430 |                                               |
|        | 60 vs 47 | Male (-) $\epsilon$ 4                            | Female (-) $\epsilon$ 4                          | Male (+) $\epsilon$ 4                            | Female (+) $\epsilon$ 4                       |
|        |          | P = 0.0655<br>R <sup>2</sup> = 0.300             | <b>P &lt; 0.0001</b> ↑<br>R <sup>2</sup> = 0.750 | <b>P = 0.0012</b> ↑<br>R <sup>2</sup> = 0.564    | <b>P = 0.0076</b> ↑<br>R <sup>2</sup> = 0.410 |
| Cortex | 60 vs 37 | (-) $\epsilon$ 4                                 |                                                  | (+) $\epsilon$ 4                                 |                                               |
|        |          | <b>P = 0.0011</b> ↑<br>R <sup>2</sup> = 0.342    |                                                  | <b>P = 0.0019</b> ↑<br>R <sup>2</sup> = 0.286    |                                               |
|        | 60 vs 37 | Male (-) $\epsilon$ 4                            | Female (-) $\epsilon$ 4                          | Male (+) $\epsilon$ 4                            | Female (+) $\epsilon$ 4                       |
|        |          | P = 0.4263<br>R <sup>2</sup> = 0.064             | <b>P = 0.0002</b> ↑<br>R <sup>2</sup> = 0.635    | P = 0.4653<br>R <sup>2</sup> = 0.042             | <b>P = 0.0034</b> ↑<br>R <sup>2</sup> = 0.469 |
| Cortex | 47 vs 37 | (-) $\epsilon$ 4                                 |                                                  | (+) $\epsilon$ 4                                 |                                               |
|        |          | <b>P &lt; 0.0001</b> ↑<br>R <sup>2</sup> = 0.481 |                                                  | <b>P &lt; 0.0001</b> ↑<br>R <sup>2</sup> = 0.437 |                                               |
|        | 47 vs 37 | Male (-) $\epsilon$ 4                            | Female (-) $\epsilon$ 4                          | Male (+) $\epsilon$ 4                            | Female (+) $\epsilon$ 4                       |
|        |          | P = 0.7143<br>R <sup>2</sup> = 0.014             | <b>P &lt; 0.0001</b> ↑<br>R <sup>2</sup> = 0.897 | <b>P = 0.0396</b> ↑<br>R <sup>2</sup> = 0.287    | <b>P = 0.0014</b> ↑<br>R <sup>2</sup> = 0.530 |

**SUPPL Table 18: Linear regression by diagnosis by *APOE*  $\epsilon$ 4 status – CB1R species vs CB1R species within cortex. CTL: control; EOAD: Early-Onset AD; LOAD: Late-Onset AD. Significant ( $P \leq 0.05$ ) observations, if any, are identified in bold text. (+) $\epsilon$ 4: positive for the *APOE*  $\epsilon$ 4 risk allele; (-) $\epsilon$ 4: negative for the *APOE*  $\epsilon$ 4 risk A positive association is identified by ‘↑’, while a negative association is identified by ‘↓’.**

| Hippocampus 60 vs 47 | (-) $\epsilon$ 4       |                         | (+) $\epsilon$ 4       |                         |
|----------------------|------------------------|-------------------------|------------------------|-------------------------|
|                      | P = 0.4374             |                         | <b>P = 0.0381</b> ↑    |                         |
|                      | R <sup>2</sup> = 0.032 |                         | R <sup>2</sup> = 0.150 |                         |
| 60 vs 47             | Male (-) $\epsilon$ 4  | Female (-) $\epsilon$ 4 | Male (+) $\epsilon$ 4  | Female (+) $\epsilon$ 4 |
|                      | P = 0.8759             | P = 0.5772              | P = 0.0834             | P = 0.2205              |
|                      | R <sup>2</sup> = 0.005 | R <sup>2</sup> = 0.027  | R <sup>2</sup> = 0.248 | R <sup>2</sup> = 0.105  |
| Hippocampus 60 vs 37 | (-) $\epsilon$ 4       |                         | (+) $\epsilon$ 4       |                         |
|                      | P = 0.1257             |                         | P = 0.5481             |                         |
|                      | R <sup>2</sup> = 0.119 |                         | R <sup>2</sup> = 0.014 |                         |
| 60 vs 37             | Male (-) $\epsilon$ 4  | Female (-) $\epsilon$ 4 | Male (+) $\epsilon$ 4  | Female (+) $\epsilon$ 4 |
|                      | <b>P = 0.0162</b> ↑    | P = 0.6431              | P = 0.3868             | P = 0.7777              |
|                      | R <sup>2</sup> = 0.717 | R <sup>2</sup> = 0.019  | R <sup>2</sup> = 0.069 | R <sup>2</sup> = 0.006  |
| Hippocampus 47 vs 37 | (-) $\epsilon$ 4       |                         | (+) $\epsilon$ 4       |                         |
|                      | P = 0.2842             |                         | P = 0.1792             |                         |
|                      | R <sup>2</sup> = 0.060 |                         | R <sup>2</sup> = 0.066 |                         |
| 47 vs 37             | Male (-) $\epsilon$ 4  | Female (-) $\epsilon$ 4 | Male (+) $\epsilon$ 4  | Female (+) $\epsilon$ 4 |
|                      | P = 0.5124             | P = 0.1061              | P = 0.0825             | P = 0.7358              |
|                      | R <sup>2</sup> = 0.090 | R <sup>2</sup> = 0.203  | R <sup>2</sup> = 0.249 | R <sup>2</sup> = 0.008  |

**SUPPL Table 19: Linear regression by diagnosis by *APOE*  $\epsilon$ 4 status – CB1R species vs CB1R species within hippocampus. CTL: control; EOAD: Early-Onset AD; LOAD: Late-Onset AD. Significant ( $P \leq 0.05$ ) observations, if any, are identified in bold text. (+) $\epsilon$ 4: positive for the *APOE*  $\epsilon$ 4 risk allele; (-) $\epsilon$ 4: negative for the *APOE*  $\epsilon$ 4 risk allele. A positive association is identified by ‘↑’, while a negative association is identified by ‘↓’.**

| Cortex                   | FAAH vs<br>MAGL | (-)ε4                                            |                                                 | (+)ε4                                         |                                               |
|--------------------------|-----------------|--------------------------------------------------|-------------------------------------------------|-----------------------------------------------|-----------------------------------------------|
|                          |                 | <b>P &lt; 0.0001</b> ↑<br>R <sup>2</sup> = 0.711 |                                                 | <b>P = 0.0005</b> ↑<br>R <sup>2</sup> = 0.364 |                                               |
|                          | FAAH vs<br>MAGL | Male (-)ε4                                       | Female (-)ε4                                    | Male (+)ε4                                    | Female (+)ε4                                  |
|                          |                 | <b>P = 0.0117</b> ↑<br>R <sup>2</sup> = 0.487    | <b>P &lt; 0.001</b> ↑<br>R <sup>2</sup> = 0.819 | P = 0.2391<br>R <sup>2</sup> = 0.105          | <b>P = 0.0021</b> ↑<br>R <sup>2</sup> = 0.504 |
| Hippocampus              | FAAH vs<br>MAGL | (-)ε4                                            |                                                 | (+)ε4                                         |                                               |
|                          |                 | <b>P = 0.0210</b> ↑<br>R <sup>2</sup> = 0.250    |                                                 | P = 0.1018<br>R <sup>2</sup> = 0.100          |                                               |
|                          | FAAH vs<br>MAGL | Male (-)ε4                                       | Female (-)ε4                                    | Male (+)ε4                                    | Female (+)ε4                                  |
|                          |                 | <b>P = 0.0343</b> ↑<br>R <sup>2</sup> = 0.625    | P = 0.0518<br>R <sup>2</sup> = 0.280            | P = 0.6059<br>R <sup>2</sup> = 0.028          | <b>P = 0.0018</b> ↑<br>R <sup>2</sup> = 0.514 |
| Cortex vs<br>Hippocampus | FAAH vs<br>FAAH | (-)ε4                                            |                                                 | (+)ε4                                         |                                               |
|                          |                 | P = 0.0634<br>R <sup>2</sup> = 0.179             |                                                 | P = 0.1177<br>R <sup>2</sup> = 0.088          |                                               |
|                          | FAAH vs<br>FAAH | Male (-)ε4                                       | Female (-)ε4                                    | Male (+)ε4                                    | Female (+)ε4                                  |
|                          |                 | P = 0.2008<br>R <sup>2</sup> = 0.303             | P = 0.1696<br>R <sup>2</sup> = 0.164            | P = 0.4888<br>R <sup>2</sup> = 0.045          | P = 0.6777<br>R <sup>2</sup> = 0.013          |
| Cortex vs<br>Hippocampus | MAGL vs<br>MAGL | (-)ε4                                            |                                                 | (+)ε4                                         |                                               |
|                          |                 | P = 0.6198<br>R <sup>2</sup> = 0.014             |                                                 | P = 0.4632<br>R <sup>2</sup> = 0.021          |                                               |
|                          | MAGL vs<br>MAGL | Male (-)ε4                                       | Female (-)ε4                                    | Male (+)ε4                                    | Female (+)ε4                                  |
|                          |                 | P = 0.8485<br>R <sup>2</sup> = 0.008             | P = 0.9573<br>R <sup>2</sup> = 0.000            | P = 0.4523<br>R <sup>2</sup> = 0.058          | P = 0.9691<br>R <sup>2</sup> = 0.000          |

**SUPPL Table 20: Linear regression by diagnosis by *APOE* ε4 status – FAAH and MAGL within and between regions. CTL: control; EOAD: Early-Onset AD; LOAD: Late-Onset AD. Significant ( $P \leq 0.05$ ) observations, if any, are identified in bold text. (+)ε4: positive for the *APOE* e4 risk allele; (-)ε4: negative for the *APOE* e4 risk A positive association is identified by ‘↑’, while a negative association is identified by ‘↓’.**

| Cortex | FAAH<br>vs 60 | (-)ε4                                         |                                               | (+)ε4                                         |                                               |
|--------|---------------|-----------------------------------------------|-----------------------------------------------|-----------------------------------------------|-----------------------------------------------|
|        |               | <b>P = 0.0064</b> ↑<br>R <sup>2</sup> = 0.253 |                                               | <b>P = 0.0138</b> ↑<br>R <sup>2</sup> = 0.192 |                                               |
|        | FAAH<br>vs 60 | Male (-)ε4                                    | Female (-)ε4                                  | Male (+)ε4                                    | Female (+)ε4                                  |
|        |               | <b>P = 0.0226</b> ↑<br>R <sup>2</sup> = 0.420 | P = 0.0672<br>R <sup>2</sup> = 0.219          | P = 0.1947<br>R <sup>2</sup> = 0.126          | <b>P = 0.0010</b> ↑<br>R <sup>2</sup> = 0.553 |
| Cortex | FAAH<br>vs 47 | (-)ε4                                         |                                               | (+)ε4                                         |                                               |
|        |               | <b>P = 0.0013</b> ↑<br>R <sup>2</sup> = 0.335 |                                               | <b>P = 0.0088</b> ↑<br>R <sup>2</sup> = 0.214 |                                               |
|        | FAAH<br>vs 47 | Male (-)ε4                                    | Female (-)ε4                                  | Male (+)ε4                                    | Female (+)ε4                                  |
|        |               | <b>P = 0.0004</b> ↑<br>R <sup>2</sup> = 0.727 | <b>P = 0.0284</b> ↑<br>R <sup>2</sup> = 0.299 | P = 0.4549<br>R <sup>2</sup> = 0.044          | <b>P = 0.0003</b> ↑<br>R <sup>2</sup> = 0.627 |
| Cortex | FAAH<br>vs 37 | (-)ε4                                         |                                               | (+)ε4                                         |                                               |
|        |               | <b>P = 0.0476</b> ↑<br>R <sup>2</sup> = 0.143 |                                               | P = 0.0779<br>R <sup>2</sup> = 0.103          |                                               |
|        | FAAH<br>vs 37 | Male (-)ε4                                    | Female (-)ε4                                  | Male (+)ε4                                    | Female (+)ε4                                  |
|        |               | P = 0.8786<br>R <sup>2</sup> = 0.003          | <b>P = 0.0275</b> ↑<br>R <sup>2</sup> = 0.302 | P = 0.9796<br>R <sup>2</sup> = 0.000          | <b>P = 0.0199</b> ↑<br>R <sup>2</sup> = 0.330 |

**SUPPL Table 21: Linear regression by diagnosis by *APOE* ε4 status – FAAH vs CB1R species within cortex. CTL: control; EOAD: Early-Onset AD; LOAD: Late-Onset AD. Significant ( $P \leq 0.05$ ) observations, if any, are identified in bold text. (+)ε4: positive for the *APOE* e4 risk allele; (-)ε4: negative for the *APOE* e4 risk A positive association is identified by ‘↑’, while a negative association is identified by ‘↓’.**

| Hippocampus | FAAH<br>vs 60 | (-)ε4                                |                                      | (+)ε4                                |                                      |
|-------------|---------------|--------------------------------------|--------------------------------------|--------------------------------------|--------------------------------------|
|             |               | P = 0.7248<br>R <sup>2</sup> = 0.007 |                                      | P = 0.7738<br>R <sup>2</sup> = 0.003 |                                      |
|             | FAAH<br>vs 60 | Male (-)ε4                           | Female (-)ε4                         | Male (+)ε4                           | Female (+)ε4                         |
|             |               | P = 0.6290<br>R <sup>2</sup> = 0.050 | P = 0.6302<br>R <sup>2</sup> = 0.090 | P = 0.9495<br>R <sup>2</sup> = 0.000 | P = 0.7079<br>R <sup>2</sup> = 0.010 |
| Hippocampus | FAAH<br>vs 47 | (-)ε4                                |                                      | (+)ε4                                |                                      |
|             |               | P = 0.4288<br>R <sup>2</sup> = 0.033 |                                      | P = 0.2968<br>R <sup>2</sup> = 0.040 |                                      |
|             | FAAH<br>vs 47 | Male (-)ε4                           | Female (-)ε4                         | Male (+)ε4                           | Female (+)ε4                         |
|             |               | P = 0.3049<br>R <sup>2</sup> = 0.207 | P = 0.5543<br>R <sup>2</sup> = 0.029 | P = 0.4863<br>R <sup>2</sup> = 0.045 | P = 0.5684<br>R <sup>2</sup> = 0.024 |
| Hippocampus | FAAH<br>vs 37 | (-)ε4                                |                                      | (+)ε4                                |                                      |
|             |               | P = 0.2467<br>R <sup>2</sup> = 0.070 |                                      | P = 0.9805<br>R <sup>2</sup> = 0.000 |                                      |
|             | FAAH<br>vs 37 | Male (-)ε4                           | Female (-)ε4                         | Male (+)ε4                           | Female (+)ε4                         |
|             |               | P = 0.4641<br>R <sup>2</sup> = 0.112 | P = 0.3378<br>R <sup>2</sup> = 0.077 | P = 0.3891<br>R <sup>2</sup> = 0.068 | P = 0.1406<br>R <sup>2</sup> = 0.148 |

**SUPPL Table 22: Linear regression by diagnosis by *APOE* ε4 status – FAAH vs CB1R species within hippocampus. CTL: control; EOAD: Early-Onset AD; LOAD: Late-Onset AD. Significant (P ≤ 0.05) observations, if any, are identified in bold text. (+)ε4: positive for the *APOE* e4 risk allele; (-)ε4: negative for the *APOE* e4 risk A positive association is identified by ‘↑’, while a negative association is identified by ‘↓’.**

| Cortex | MAGL vs 60 | (-)ε4                                            |                                               | (+)ε4                                            |                                                  |
|--------|------------|--------------------------------------------------|-----------------------------------------------|--------------------------------------------------|--------------------------------------------------|
|        |            | <b>P = 0.0484</b> ↑<br>R <sup>2</sup> = 0.142    |                                               | <b>P = 0.0189</b> ↑<br>R <sup>2</sup> = 0.176    |                                                  |
|        | MAGL vs 60 | Male (-)ε4                                       | Female (-)ε4                                  | Male (+)ε4                                       | Female (+)ε4                                     |
|        |            | P = 0.4818<br>R <sup>2</sup> = 0.050             | <b>P = 0.0390</b> ↑<br>R <sup>2</sup> = 0.270 | P = 0.8947<br>R <sup>2</sup> = 0.001             | <b>P = 0.0018</b> ↑<br>R <sup>2</sup> = 0.512    |
| Cortex | MAGL vs 47 | (-)ε4                                            |                                               | (+)ε4                                            |                                                  |
|        |            | <b>P &lt; 0.0001</b> ↑<br>R <sup>2</sup> = 0.491 |                                               | <b>P = 0.0010</b> ↑<br>R <sup>2</sup> = 0.316    |                                                  |
|        | MAGL vs 47 | Male (-)ε4                                       | Female (-)ε4                                  | Male (+)ε4                                       | Female (+)ε4                                     |
|        |            | <b>P = 0.0001</b> ↑<br>R <sup>2</sup> = 0.789    | <b>P = 0.0057</b> ↑<br>R <sup>2</sup> = 0.431 | P = 0.3322<br>R <sup>2</sup> = 0.072             | <b>P = 0.0003</b> ↑<br>R <sup>2</sup> = 0.614    |
| Cortex | MAGL vs 37 | (-)ε4                                            |                                               | (+)ε4                                            |                                                  |
|        |            | <b>P = 0.0287</b> ↑<br>R <sup>2</sup> = 0.171    |                                               | <b>P &lt; 0.0001</b> ↑<br>R <sup>2</sup> = 0.623 |                                                  |
|        | MAGL vs 37 | Male (-)ε4                                       | Female (-)ε4                                  | Male (+)ε4                                       | Female (+)ε4                                     |
|        |            | P = 0.7908<br>R <sup>2</sup> = 0.007             | <b>P = 0.0060</b> ↑<br>R <sup>2</sup> = 0.427 | <b>P = 0.0060</b> ↑<br>R <sup>2</sup> = 0.452    | <b>P &lt; 0.0001</b> ↑<br>R <sup>2</sup> = 0.784 |

**SUPPL Table 23: Linear regression by diagnosis by *APOE* ε4 status – MAGL vs CB1R species within cortex. CTL: control; EOAD: Early-Onset AD; LOAD: Late-Onset AD. Significant ( $P \leq 0.05$ ) observations, if any, are identified in bold text. (+)ε4: positive for the *APOE* e4 risk allele; (-)ε4: negative for the *APOE* e4 risk A positive association is identified by ‘↑’, while a negative association is identified by ‘↓’.**

| Hippocampus MAGL vs 60 |  | (-)ε4                  |                        | (+)ε4                  |                        |
|------------------------|--|------------------------|------------------------|------------------------|------------------------|
|                        |  | <b>P = 0.0229</b> ↑    |                        | P = 0.9489             |                        |
|                        |  | R <sup>2</sup> = 0.244 |                        | R <sup>2</sup> = 0.000 |                        |
| MAGL vs 60             |  | Male (-)ε4             | Female (-)ε4           | Male (+)ε4             | Female (+)ε4           |
|                        |  | P = 0.4479             | <b>P = 0.0247</b> ↑    | P = 0.8382             | P = 0.7155             |
|                        |  | R <sup>2</sup> = 0.119 | R <sup>2</sup> = 0.355 | R <sup>2</sup> = 0.004 | R <sup>2</sup> = 0.010 |
| Hippocampus MAGL vs 47 |  | (-)ε4                  |                        | (+)ε4                  |                        |
|                        |  | P = 0.2138             |                        | P = 0.2489             |                        |
|                        |  | R <sup>2</sup> = 0.080 |                        | R <sup>2</sup> = 0.051 |                        |
| MAGL vs 47             |  | Male (-)ε4             | Female (-)ε4           | Male (+)ε4             | Female (+)ε4           |
|                        |  | P = 0.7362             | P = 0.4823             | <b>P = 0.0046</b> ↑    | P = 0.6917             |
|                        |  | R <sup>2</sup> = 0.025 | R <sup>2</sup> = 0.042 | R <sup>2</sup> = 0.570 | R <sup>2</sup> = 0.012 |
| Hippocampus MAGL vs 37 |  | (-)ε4                  |                        | (+)ε4                  |                        |
|                        |  | P = 0.9646             |                        | P = 0.2538             |                        |
|                        |  | R <sup>2</sup> = 0.000 |                        | R <sup>2</sup> = 0.050 |                        |
| MAGL vs 37             |  | Male (-)ε4             | Female (-)ε4           | Male (+)ε4             | Female (+)ε4           |
|                        |  | P = 0.5415             | P = 0.8144             | P = 0.8692             | P = 0.1896             |
|                        |  | R <sup>2</sup> = 0.080 | R <sup>2</sup> = 0.005 | R <sup>2</sup> = 0.003 | R <sup>2</sup> = 0.120 |

**SUPPL Table 24: Linear regression by diagnosis by *APOE* ε4 status – MAGL vs CB1R species within hippocampus. CTL: control; EOAD: Early-Onset AD; LOAD: Late-Onset AD. Significant (P ≤ 0.05) observations, if any, are identified in bold text. (+)ε4: positive for the *APOE* e4 risk allele; (-)ε4: negative for the *APOE* e4 risk A positive association is identified by ‘↑’, while a negative association is identified by ‘↓’.**

| Cortex | AAO vs 60 | (-) $\epsilon$ 4                      |                                      | (+) $\epsilon$ 4                              |                                      |
|--------|-----------|---------------------------------------|--------------------------------------|-----------------------------------------------|--------------------------------------|
|        |           | P = 0.8986<br>R <sup>2</sup> = 0.003  |                                      | <b>P = 0.0295</b> ↓<br>R <sup>2</sup> = 0.206 |                                      |
|        | AAO vs 60 | Male (-) $\epsilon$ 4                 | Female (-) $\epsilon$ 4              | Male (+) $\epsilon$ 4                         | Female (+) $\epsilon$ 4              |
|        |           | P = 0.4143<br>R <sup>2</sup> = 0.343  | P = 0.7798<br>R <sup>2</sup> = 0.030 | <b>P = 0.0188</b> ↓<br>R <sup>2</sup> = 0.519 | P = 0.1974<br>R <sup>2</sup> = 0.146 |
| Cortex | AAO vs 47 | (-) $\epsilon$ 4                      |                                      | (+) $\epsilon$ 4                              |                                      |
|        |           | P = 0.6984<br>R <sup>2</sup> = 0.023  |                                      | P = 0.1201<br>R <sup>2</sup> = 0.111          |                                      |
|        | AAO vs 47 | Male (-) $\epsilon$ 4                 | Female (-) $\epsilon$ 4              | Male (+) $\epsilon$ 4                         | Female (+) $\epsilon$ 4              |
|        |           | P = 0.2664<br>R <sup>2</sup> = 0.538  | P = 0.8942<br>R <sup>2</sup> = 0.007 | <b>P = 0.0106</b> ↓<br>R <sup>2</sup> = 0.579 | P = 0.5528<br>R <sup>2</sup> = 0.032 |
| Cortex | AAO vs 37 | (-) $\epsilon$ 4                      |                                      | (+) $\epsilon$ 4                              |                                      |
|        |           | P = 0.8158<br>R <sup>2</sup> = 0.008  |                                      | P = 0.9087<br>R <sup>2</sup> = 0.001          |                                      |
|        | AAO vs 37 | Male (-) $\epsilon$ 4                 | Female (-) $\epsilon$ 4              | Male (+) $\epsilon$ 4                         | Female (+) $\epsilon$ 4              |
|        |           | P = 0.5819<br>R <sup>2</sup> = 0.0175 | P = 0.3040<br>R <sup>2</sup> = 0.338 | P = 0.5218<br>R <sup>2</sup> = 0.053          | P = 0.9633<br>R <sup>2</sup> = 0.000 |

**SUPPL Table 25: Linear regression by diagnosis by *APOE*  $\epsilon$ 4 status – Age-at-Onset (AAO; in yrs) vs CB1R species within cortex. CTL: control; EOAD: Early-Onset AD; LOAD: Late-Onset AD. Significant ( $P \leq 0.05$ ) observations, if any, are identified in bold text. (+) $\epsilon$ 4: positive for the *APOE*  $\epsilon$ 4 risk allele; (-) $\epsilon$ 4: negative for the *APOE*  $\epsilon$ 4 risk A positive association is identified by ‘↑’, while a negative association is identified by ‘↓’.**

| Cortex | Duration vs 60 | (-)ε4                                |                                      | (+)ε4                                        |                                      |
|--------|----------------|--------------------------------------|--------------------------------------|----------------------------------------------|--------------------------------------|
|        |                | P = 0.6797<br>R <sup>2</sup> = 0.030 |                                      | <b>P = 0.0244↑</b><br>R <sup>2</sup> = 0.219 |                                      |
|        | Duration vs 60 | Male (-)ε4                           | Female (-)ε4                         | Male (+)ε4                                   | Female (+)ε4                         |
|        |                | P = 0.3229<br>R <sup>2</sup> = 0.764 | P = 0.6399<br>R <sup>2</sup> = 0.082 | P = 0.0636<br>R <sup>2</sup> = 0.367         | P = 0.1660<br>R <sup>2</sup> = 0.167 |
| Cortex | Duration vs 47 | (-)ε4                                |                                      | (+)ε4                                        |                                      |
|        |                | P = 0.9271<br>R <sup>2</sup> = 0.002 |                                      | <b>P = 0.0083↑</b><br>R <sup>2</sup> = 0.288 |                                      |
|        | Duration vs 47 | Male (-)ε4                           | Female (-)ε4                         | Male (+)ε4                                   | Female (+)ε4                         |
|        |                | P = 0.7280<br>R <sup>2</sup> = 0.172 | P = 0.8509<br>R <sup>2</sup> = 0.014 | <b>P = 0.0169↑</b><br>R <sup>2</sup> = 0.531 | P = 0.1259<br>R <sup>2</sup> = 0.200 |
| Cortex | Duration vs 37 | (-)ε4                                |                                      | (+)ε4                                        |                                      |
|        |                | P = 0.2747<br>R <sup>2</sup> = 0.194 |                                      | P = 0.6398<br>R <sup>2</sup> = 0.011         |                                      |
|        | Duration vs 37 | Male (-)ε4                           | Female (-)ε4                         | Male (+)ε4                                   | Female (+)ε4                         |
|        |                | P = 0.9421<br>R <sup>2</sup> = 0.008 | P = 0.0707<br>R <sup>2</sup> = 0.716 | P = 0.3185<br>R <sup>2</sup> = 0.124         | P = 0.4161<br>R <sup>2</sup> = 0.061 |

**SUPPL Table 26: Linear regression by diagnosis by *APOE* ε4 status – Duration (in years) vs CB1R species within cortex. CTL: control; EOAD: Early-Onset AD; LOAD: Late-Onset AD. Significant ( $P \leq 0.05$ ) observations, if any, are identified in bold text. (+)ε4: positive for the *APOE* ε4 risk allele; (-)ε4: negative for the *APOE* ε4 risk A positive association is identified by ‘↑’, while a negative association is identified by ‘↓’.**

| Hippocampus AAO vs 60 |  | (-)ε4                  |                        | (+)ε4                  |                        |
|-----------------------|--|------------------------|------------------------|------------------------|------------------------|
|                       |  | P = 0.6285             |                        | P = 0.2865             |                        |
|                       |  | R <sup>2</sup> = 0.042 |                        | R <sup>2</sup> = 0.057 |                        |
| AAO vs 60             |  | Male (-)ε4             | Female (-)ε4           | Male (+)ε4             | Female (+)ε4           |
|                       |  | P = 0.3090             | P = 0.9285             | P = 0.3710↓            | P = 0.3804             |
|                       |  | R <sup>2</sup> = 0.478 | R <sup>2</sup> = 0.005 | R <sup>2</sup> = 0.116 | R <sup>2</sup> = 0.071 |
| Hippocampus AAO vs 47 |  | (-)ε4                  |                        | (+)ε4                  |                        |
|                       |  | P = 0.7767             |                        | P = 0.5172             |                        |
|                       |  | R <sup>2</sup> = 0.015 |                        | R <sup>2</sup> = 0.021 |                        |
| AAO vs 47             |  | Male (-)ε4             | Female (-)ε4           | Male (+)ε4             | Female (+)ε4           |
|                       |  | P = 0.9302             | P = 0.7598             | P = 0.2576             | P = 0.2193             |
|                       |  | R <sup>2</sup> = 0.005 | R <sup>2</sup> = 0.058 | R <sup>2</sup> = 0.178 | R <sup>2</sup> = 0.134 |
| Hippocampus AAO vs 37 |  | (-)ε4                  |                        | (+)ε4                  |                        |
|                       |  | P = 0.1538             |                        | P = 0.5343             |                        |
|                       |  | R <sup>2</sup> = 0.308 |                        | R <sup>2</sup> = 0.020 |                        |
| AAO vs 37             |  | Male (-)ε4             | Female (-)ε4           | Male (+)ε4             | Female (+)ε4           |
|                       |  | P = 0.1409             | P = 0.7593             | P = 0.6972             | P = 0.8419             |
|                       |  | R <sup>2</sup> = 0.738 | R <sup>2</sup> = 0.058 | R <sup>2</sup> = 0.023 | R <sup>2</sup> = 0.004 |

**SUPPL Table 27: Linear regression by diagnosis by *APOE* ε4 status – Age-at-Onset (AAO; in years) vs CB1R species within hippocampus. CTL: control; EOAD: Early-Onset AD; LOAD: Late-Onset AD. Significant ( $P \leq 0.05$ ) observations, if any, are identified in bold text. (+)ε4: positive for the *APOE* ε4 risk allele; (-)ε4: negative for the *APOE* ε4 risk A positive association is identified by ‘↑’, while a negative association is identified by ‘↓’.**

| Hippocampus | Duration vs 60 | (-)ε4                                |                                      | (+)ε4                                 |                                      |
|-------------|----------------|--------------------------------------|--------------------------------------|---------------------------------------|--------------------------------------|
|             |                | P = 0.4959<br>R <sup>2</sup> = 0.097 |                                      | P = 0.0291↑<br>R <sup>2</sup> = 0.216 |                                      |
|             | Duration vs 60 | Male (-)ε4                           | Female (-)ε4                         | Male (+)ε4                            | Female (+)ε4                         |
|             |                | P = 0.9425<br>R <sup>2</sup> = 0.008 | P = 0.6108<br>R <sup>2</sup> = 0.152 | P = 0.0968<br>R <sup>2</sup> = 0.344  | P = 0.1478<br>R <sup>2</sup> = 0.180 |
| Hippocampus | Duration vs 47 | (-)ε4                                |                                      | (+)ε4                                 |                                      |
|             |                | P = 0.4806<br>R <sup>2</sup> = 0.104 |                                      | P = 0.4485<br>R <sup>2</sup> = 0.029  |                                      |
|             | Duration vs 47 | Male (-)ε4                           | Female (-)ε4                         | Male (+)ε4                            | Female (+)ε4                         |
|             |                | P = 0.4771<br>R <sup>2</sup> = 0.536 | P = 0.7754<br>R <sup>2</sup> = 0.051 | P = 0.6623<br>R <sup>2</sup> = 0.029  | P = 0.2857<br>R <sup>2</sup> = 0.103 |
| Hippocampus | Duration vs 37 | (-)ε4                                |                                      | (+)ε4                                 |                                      |
|             |                | P = 0.9636<br>R <sup>2</sup> = 0.001 |                                      | P = 0.6550<br>R <sup>2</sup> = 0.010  |                                      |
|             | Duration vs 37 | Male (-)ε4                           | Female (-)ε4                         | Male (+)ε4                            | Female (+)ε4                         |
|             |                | P = 0.8120<br>R <sup>2</sup> = 0.085 | P = 0.9327<br>R <sup>2</sup> = 0.005 | P = 0.4585<br>R <sup>2</sup> = 0.081  | P = 0.7800<br>R <sup>2</sup> = 0.007 |

**SUPPL Table 28: Linear regression by diagnosis by *APOE* ε4 status – Duration (in years) vs CB1R species within hippocampus. CTL: control; EOAD: Early-Onset AD; LOAD: Late-Onset AD. Significant ( $P \leq 0.05$ ) observations, if any, are identified in bold text. (+)ε4: positive for the *APOE* ε4 risk allele; (-)ε4: negative for the *APOE* ε4 risk A positive association is identified by ‘↑’, while a negative association is identified by ‘↓’.**
